# Supplementary material
Source: PubMed Central journal article supplement (PMC6398604)
Supplement: NIHMS1013823-supplement-1.pdf [file NIHMS1013823-supplement-1.pdf]

## Supporting Information

### Optimization of 8-Hydroxyquinolines as Inhibitors of Catechol *O*-Methyltransferase

Ingrid Buchler,<sup>§</sup> Daniel Akuma,<sup>§</sup> Vinh Au,<sup>§</sup> Gregory Carr,<sup>§,¶</sup> Pablo de León,<sup>§</sup> Michael DePasquale,<sup>§</sup> Glen Ernst,<sup>§</sup> Yifang Huang,<sup>§</sup> Martha Kimos,<sup>§</sup> Anna Kolobova,<sup>§</sup> Michael Poslusney,<sup>§</sup> Huijun Wei,<sup>§</sup> Dominique Swinnen,<sup>†</sup> Florian Montel,<sup>†</sup> Florence Moureau,<sup>†</sup> Emilie Jigorel,<sup>†</sup> Monika-Sarah E.D. Schulze,<sup>||</sup> Martyn Wood,<sup>†</sup> and James C. Barrow<sup>§,¶,\*</sup>

<sup>§</sup> Lieber Institute for Brain Development, 855 North Wolfe Street, Baltimore, MD 21205

<sup>¶</sup> Department of Pharmacology, Johns Hopkins University School of Medicine, 855 North Wolfe Street, Baltimore, MD 21287

<sup>†</sup> UCB Biopharma SPRL, B-1420 Braine-l'Alleud, Belgium

<sup>||</sup> UCB Biopharma, 216 Bath Road, Slough SL1 3WE, United Kingdom

### Table of Contents

|                                                                                            |     |
|--------------------------------------------------------------------------------------------|-----|
| <b>S1.</b> Table S1. Mouse exposure timecourse of 5,7-substituted 8-hydroxyquinolines..... | S2. |
| <b>S2.</b> Figure S1. Mouse exposure timecourse.....                                       | S3. |
| <b>S3.</b> Table S2. Rat Biomarker details .....                                           | S3. |
| <b>S4.</b> Crystallographic statistical information .....                                  | S4. |

**Table S1. Mouse Exposure time course of 5,7-substituted 8-hydroxyquinolines.<sup>a</sup>**

| Example | time 5 minutes      |                   | time 15 minutes     |                   | time 60 minutes     |                   |
|---------|---------------------|-------------------|---------------------|-------------------|---------------------|-------------------|
|         | mean Plasma (ng/ml) | mean Brain (ng/g) | mean Plasma (ng/ml) | mean Brain (ng/g) | mean Plasma (ng/ml) | mean Brain (ng/g) |
| 11      | 7929 ± 2226         | 715 ± 109         | 2776 ± 984          | 144 ± 43          | 173 ± 60            | BLQ*              |
| 12      | 5458 ± 53           | 1090 ± 203        | 689 ± 87            | 167 ± 3           | 68 ± 69             | 10 ± 15           |
| 15      | 5457 ± 1562         | 311 ± 115         | 935 ± 69            | 60 ± 6            | 250 ± 296           | 11 ± 16           |
| 16      | 706 ± 155           | 184 ± 55          | 402 ± 379           | 162 ± 134         | 235 ± 51            | 109 ± 16          |
| 17      | 3894 ± 2208         | BLQ**             | 2904 ± 1690         | 510 ± 36          | 1329 ± 1363         | 256 ± 23          |
| 18      | 3052 ± 4211         | 531 ± 698         | 5035 ± 6046         | 1568 ± 1957       | 2542 ± 2486         | 1094 ± 901        |
| 19      | 16725 ± 11844       | 3336 ± 2918       | 25700 ± 1131        | 6930 ± 509        | 16650 ± 5020        | 5655 ± 784        |
| 20      | 17200 ± 1697        | 1584 ± 184        | 3575 ± 304          | 319 ± 81          | 5720 ± 1428         | 527 ± 44          |
| 21      | 3638 ± 1500         | 525 ± 198         | 4929 ± 1229         | 992 ± 328         | 1744 ± 120          | 518 ± 77          |
| 22      | 8570 ± 1307         | 901 ± 366         | 13449 ± 404         | 2736 ± 156        | 8612 ± 1304         | 2661 ± 213        |
| 25      | 14060 ± 8400        | 3915 ± 1209       | 17000 ± 1838        | 3810 ± 721        | 6160 ± 1343         | 1914 ± 1497       |
| 26      | 15756 ± 331         | 2348 ± 667        | 19282 ± 3442        | 3912 ± 956        | 14669 ± 607         | 2792 ± 439        |
| 28      | 32066 ± 4847        | 2981 ± 580        | 10286 ± 5853        | 948 ± 598         | 1819 ± 307          | 110 ± 38          |
| 29      | 32850 ± 2050        | 1321 ± 788        | 24650 ± 1202        | 506 ± 71          | 16250 ± 494         | 1154 ± 189        |
| 30      | 3186 ± 116          | 509 ± 0           | 2316 ± 350          | 289 ± 16          | 576 ± 406           | 55 ± 38           |

<sup>a</sup> n=2 mice per timepoint, data is average ±SEM.

\* LOQ = 10 ng/ml

\*\* LOQ = 50 ng/ml

**Figure S1. Mouse brain concentrations**

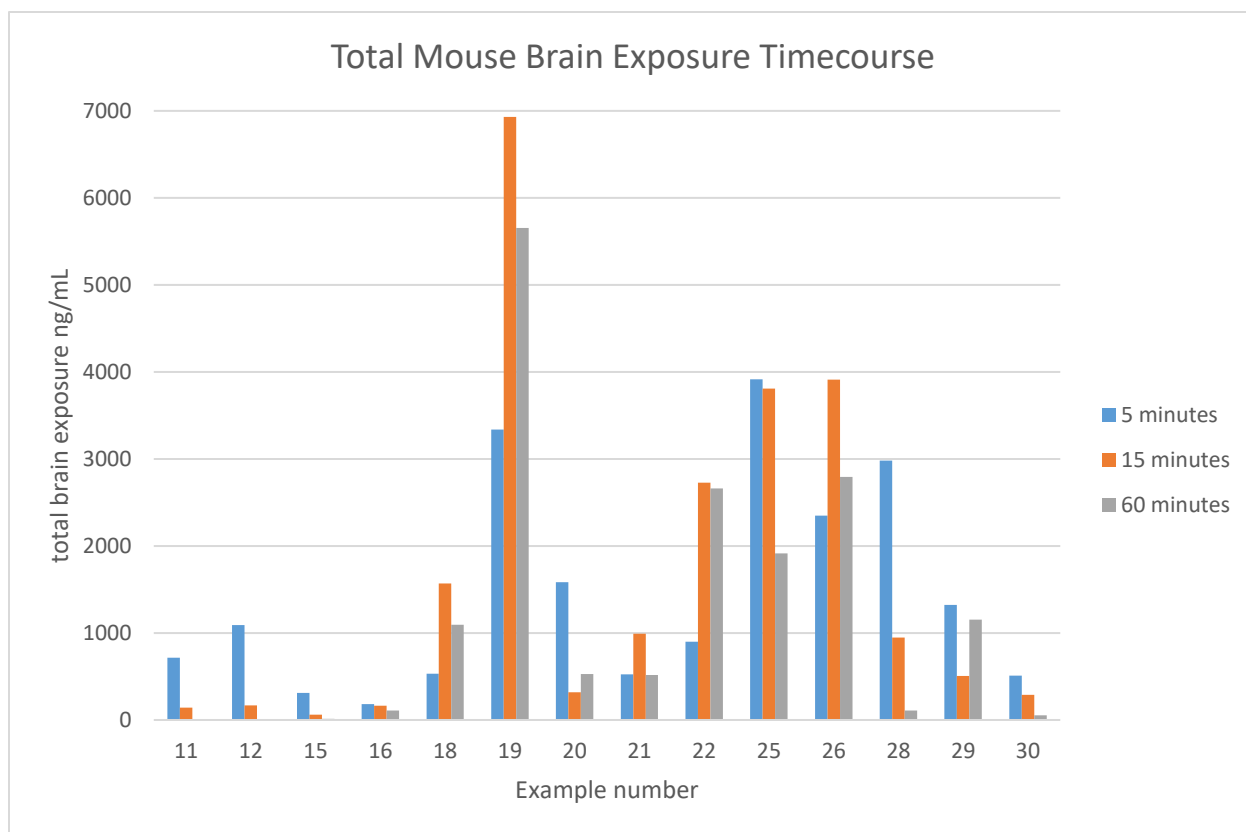

**Table S2. Rat Biomarker Details<sup>a</sup>**

| Example   | Number of rats (vehicle) | Number of rats (drug) | total plasma (nM) | total brain (nmol/g) | total CSF (nM) |
|-----------|--------------------------|-----------------------|-------------------|----------------------|----------------|
| <b>1</b>  | 8                        | 8                     | 3805 ± 1424       | BLQ*                 | BLQ**          |
| <b>20</b> | 10                       | 10                    | 4005 ± 1010       | 321.0 ± 79.4         | 127.3 ± 33.9   |
| <b>25</b> | 10                       | 10                    | 9719 ± 1368       | 305 ± 111            | 321 ± 58       |
| <b>26</b> | 9                        | 7                     | 6471 ± 1211       | 353 ± 103            | 358 ± 64       |
| <b>28</b> | 5                        | 5                     | 3888 ± 563        | 437.8 ± 128.4        | 157.3 ± 26.0   |

<sup>a</sup> Rats dosed orally at 10mg/kg, samples collected 4 hours after dosing

\* LOQ= 200 ng/mL

\*\* LOQ= 50ng/mL

## Co-Crystal structure of S-COMT with compound **21**

The soluble part of rat COMT from M44 to S264 with N-terminal His-tag was recombinantly produced in *E. coli*. Cells were lysed (lysis buffer: 100 mM Tris/HCl pH 8.0, 300 mM NaCl, 10% glycerol, 5 mM 2-mercaptoethanol, 5 mM MgCl<sub>2</sub>, protease inhibitor cocktail (Sigma-Aldrich)) and after centrifugation (15 min, 30'000 x g, 4 °C) Ni-NTA resin (ThermoFisher Scientific) added to supernatant and incubated for 2 hours at 4 °C. After washing with 100 mM Tris pH 7.5, 200 mM NaCl, 10% glycerol, 5 mM 2-mercaptoethanol, 7 mM imidazole protein was eluted with 100 mM Tris pH 7.5, 200 mM NaCl, 10% glycerol, 5 mM 2-mercaptoethanol, 100 mM imidazole. N-terminal His-tag was removed by TEV protease cleavage using His-tagged TEV (Sigma-Aldrich) which was subsequently separated from cleaved protein using Ni-NTA resin (ThermoFisher Scientific). Protein was further purified by size exclusion chromatography (HiLoad Superdex 75 prep grade (GE Healthcare Life Sciences), 50 mM MES pH 6.5, 10 mM DTT, 1 mM EDTA, 10% glycerol) and concentrated to around 5 mg mL<sup>-1</sup>. Following the protocol from M. Ellermann et al.<sup>1</sup> 1 μM rat S-COMT was incubated overnight at 4 °C with 10 μM compound **21** and 1 mM SAM (Sigma-Aldrich) in 50 mM Tris-HCl pH 7.6, 50 mM NaCl, 10 mM DTT, 2 mM MgCl<sub>2</sub>, concentrated to 13 mg mL<sup>-1</sup> and cleared by centrifugation. Crystallization was set up at 18 °C with hanging drop vapour diffusion and crystals grew in 100 mM Bis-Tris propane pH 5.5-7.0, 100 mM NaCl, 1.2-1.8 M (NH<sub>4</sub>)<sub>2</sub>SO<sub>4</sub>. The crystal was cryo-protected in 25 mM Bis-Tris propane pH 7.3, 40% (w/v) PEG3350, 150 mM sodium formate and flash-cooled in liquid nitrogen for data collection. Diffraction data were collected at 100 K using a MicroMax-007 HF rotating anode X-ray generator (Rigaku) and mar345 image plate detector (marXperts). Data were integrated and scaled using MOSFLM<sup>2</sup> and SCALA<sup>3</sup>. The structure was determined by molecular replacement using PHASER<sup>4</sup> (CCP4 program suite<sup>5</sup>) and the published S-COMT structure (PDB accession

code: 3S68)<sup>1</sup>, without ligand, as search model. Structural refinement was performed with PHENIX<sup>6</sup> with altering cycles of manual model building with COOT<sup>7</sup>. The crystallographic statistics are summarized in Table 1. The protein structure was validated using MolProbity<sup>8</sup>. The coordinates and structure factors have been deposited in the Protein Data Bank (entry code 6GY1). Molecular pictures are prepared using program PyMol<sup>9</sup>.

**Table S3. Data collection and refinement statistics.**

| S-COMT/compound <b>21</b><br>(PDB ID 6GY1) |                                     |
|--------------------------------------------|-------------------------------------|
| <b>Data collection</b>                     |                                     |
| Space group                                | P3 <sub>2</sub> 21                  |
| Resolution range (Å)                       | 56.11-2.10 (2.21-2.10) <sup>a</sup> |
| <b>Unit cell dimensions</b>                |                                     |
| a,b,c (Å)                                  | 50.4, 50.4, 168.3                   |
| α,β,γ (°)                                  | 90, 90, 120                         |
| Wavelength (Å)                             | 1.54179                             |
| No. molecules in asymmetric unit           | 1                                   |
| Completeness (%)                           | 99.3 (99.5)                         |
| Multiplicity                               | 3.4 (3.5)                           |
| R <sub>merge</sub>                         | 0.073 (0.303)                       |
| Mean I/σI                                  | 8.0 (2.5)                           |
| <b>Refinement</b>                          |                                     |
| Resolution range (Å)                       | 42.26-2.10 (2.26-2.10)              |
| No. reflections                            | 14913                               |
| R <sub>work</sub> /R <sub>free</sub>       | 0.2123/0.2489                       |
| No. non-H atoms overall                    | 1767                                |
| protein                                    | 1698                                |
| ligands                                    | 27                                  |
| water                                      | 42                                  |
| Average B-factor (Å <sup>2</sup> ) overall | 30.30                               |
| protein                                    | 30.32                               |
| ligands                                    | 32.70                               |
| water                                      | 27.77                               |
| <b>Geometry</b>                            |                                     |
| R.m.s. deviation bond lengths (Å)          | 0.008                               |
| R.m.s. deviation bond angles (°)           | 0.987                               |
| Ramachandran favored (%)                   | 96                                  |
| Ramachandran allowed (%)                   | 4                                   |
| Ramachandran outliers (%)                  | 0                                   |

<sup>a</sup>Statistics in the highest resolution bins are shown in parenthesis.

- 1 Ellermann, M. *et al.* Catechol-O-methyltransferase in complex with substituted 3'-deoxyribose bisubstrate inhibitors. *Acta Crystallogr D Biol Crystallogr* **68**, 253-260, doi:10.1107/S0907444912001138 (2012).
- 2 Battye, T. G., Kontogiannis, L., Johnson, O., Powell, H. R. & Leslie, A. G. iMOSFLM: a new graphical interface for diffraction-image processing with MOSFLM. *Acta Crystallogr D Biol Crystallogr* **67**, 271-281, doi:10.1107/S0907444910048675 (2011).
- 3 Evans, P. Scaling and assessment of data quality. *Acta Crystallogr D Biol Crystallogr* **62**, 72-82, doi:10.1107/S0907444905036693 (2006).
- 4 McCoy, A. J. *et al.* Phaser crystallographic software. *J Appl Crystallogr* **40**, 658-674, doi:10.1107/S0021889807021206 (2007).
- 5 Collaborative Computational Project, N. The CCP4 suite: programs for protein crystallography. *Acta Crystallogr D Biol Crystallogr* **50**, 760-763, doi:10.1107/S0907444994003112 (1994).
- 6 Adams, P. D. *et al.* PHENIX: a comprehensive Python-based system for macromolecular structure solution. *Acta Crystallogr D Biol Crystallogr* **66**, 213-221, doi:10.1107/S0907444909052925 (2010).
- 7 Emsley, P., Lohkamp, B., Scott, W. G. & Cowtan, K. Features and development of Coot. *Acta Crystallogr D Biol Crystallogr* **66**, 486-501, doi:10.1107/S0907444910007493 (2010).
- 8 Chen, V. B. *et al.* MolProbity: all-atom structure validation for macromolecular crystallography. *Acta Crystallogr D Biol Crystallogr* **66**, 12-21, doi:10.1107/S0907444909042073 (2010).
- 9 DeLano, W. The PyMOL Molecular Graphics System. *Version 12r3pre*, Schroedinger, LLC (2002).
